# Supplementary material for: Antibiotic Resistance Characteristics of Pseudomonas aeruginosa Isolated from Keratitis in Australia and India
Source: PubMed Central journal article supplement (PMC7559795; doi:10.3390/antibiotics9090600), 2020-09-14
Supplement: antibiotics-09-00600-s001.pdf [file antibiotics-09-00600-s001.pdf]

S 1. Details of the *Pseudomonas aeruginosa* isolates used in the current study.

| <i>P. aeruginosa</i> Isolates | Source       | Region    | Year of isolation | % GC | No. of contigs | Total sequence length (bp) | CDSs (total) | tRNAs |
|-------------------------------|--------------|-----------|-------------------|------|----------------|----------------------------|--------------|-------|
| 123                           | Cornea       | Australia | 2005              | 66.4 | 86             | 6,357,971                  | 5858         | 57    |
| 126                           | Cornea       | Australia | 2005              | 66.4 | 81             | 6,470,807                  | 6007         | 57    |
| 127                           | Cornea       | Australia | 2005              | 66.4 | 86             | 6,357,971                  | 5858         | 57    |
| 162                           | Cornea       | Australia | 2006              | 66.2 | 87             | 6,639,257                  | 6131         | 59    |
| 169                           | Cornea       | Australia | 2006              | 66.4 | 50             | 6,397,665                  | 5918         | 57    |
| 176                           | Contact lens | Australia | 2004              | 65.8 | 305            | 7,065,610                  | 6672         | 59    |
| 181                           | Cornea       | Australia | 2006              | 65.7 | 122            | 7,109,511                  | 6619         | 63    |
| 182                           | Cornea       | Australia | 2004              | 66.1 | 58             | 6,836,159                  | 6392         | 63    |
| 223                           | Cornea       | Australia | 2018              | 66.6 | 108            | 6,923,150                  | 6408         | 70    |
| 224                           | Cornea       | Australia | 2018              | 66.4 | 151            | 6,418,520                  | 5811         | 67    |
| 225                           | Cornea       | Australia | 2018              | 65.8 | 294            | 7,287,087                  | 6607         | 68    |
| 227                           | Cornea       | Australia | 2018              | 65.6 | 102            | 7,141,983                  | 6529         | 68    |
| 233                           | Cornea       | Australia | 2019              | 66.3 | 92             | 6,349,374                  | 5745         | 65    |
| 235                           | Cornea       | Australia | 2019              | 66.1 | 56             | 6,279,891                  | 5719         | 68    |
| 188                           | Cornea       | India     | 2017              | 66.5 | 56             | 6,329,075                  | 5818         | 58    |
| 189                           | Cornea       | India     | 2017              | 66.5 | 59             | 6,329,723                  | 5820         | 58    |
| 193                           | Cornea       | India     | 2017              | 66.3 | 66             | 6,369,452                  | 5888         | 61    |
| 198                           | Cornea       | India     | 2017              | 66   | 119            | 7,101,775                  | 6727         | 59    |
| 202                           | Cornea       | India     | 2017              | 66   | 368            | 7,192,476                  | 6883         | 61    |
| 206                           | Cornea       | India     | 2017              | 66.4 | 55             | 6,535,880                  | 6047         | 58    |
| 216                           | Cornea       | India     | 2018              | 66.1 | 1917           | 8,328,371                  | 8943         | 86    |
| 217                           | Cornea       | India     | 2018              | 66.1 | 132            | 6,886,566                  | 6482         | 58    |
| 218                           | Cornea       | India     | 2018              | 66.4 | 77             | 6,375,153                  | 5840         | 58    |
| 219                           | Cornea       | India     | 2018              | 65.9 | 166            | 7,456,853                  | 7112         | 59    |
| 220                           | Cornea       | India     | 2018              | 66.3 | 90             | 6,653,669                  | 6144         | 57    |
| 221                           | Cornea       | India     | 2018              | 65.6 | 294            | 7,205,091                  | 6829         | 59    |

Supplementary Table 2. Gene variations of resistance genes in *Pseudomonas aeruginosa* isolates (the grey shaded strains were isolated from Australia).

| Gene name   | Mechanism         | <i>Pseudomonas aeruginosa</i>            |     |     |     |     |     |     |     |     |     |     |     |     |     |     |     |     |     |     |     |     |     |     |     |     |     |
|-------------|-------------------|------------------------------------------|-----|-----|-----|-----|-----|-----|-----|-----|-----|-----|-----|-----|-----|-----|-----|-----|-----|-----|-----|-----|-----|-----|-----|-----|-----|
|             |                   | Number of Single Nucleotide polymorphism |     |     |     |     |     |     |     |     |     |     |     |     |     |     |     |     |     |     |     |     |     |     |     |     |     |
|             |                   | 123                                      | 126 | 127 | 162 | 169 | 176 | 181 | 182 | 223 | 224 | 225 | 227 | 233 | 235 | 188 | 189 | 193 | 198 | 202 | 206 | 216 | 217 | 218 | 219 | 220 | 221 |
| <i>triA</i> |                   | 1                                        | 1   | 1   | 2   | 2   | 1   | 0   | 0   | 1   | 0   | 0   | 0   | 3   | 0   | 0   | 0   | 3   | 5   | 3   | 1   | 1   | 4   | 0   | 5   | 3   | 3   |
| <i>triB</i> |                   | 0                                        | 0   | 1   | 0   | 0   | 1   | 1   | 0   | 1   | 0   | 0   | 0   | 1   | 1   | 1   | 1   | 1   | 0   | 0   | 1   | 2   | 0   | 0   | 0   | 0   |     |
| <i>triC</i> |                   | 0                                        | 0   | 0   | 1   | 1   | 2   | 0   | 0   | 0   | 0   | 0   | 2   | 0   | 0   | 0   | 0   | 2   | 2   | 0   | 0   | 2   | 0   | 2   | 2   | 3   |     |
| <i>mexR</i> |                   | 0                                        | 0   | 0   | 1   | 1   | 0   | 0   | 2   | 0   | 1   | 0   | 0   | 1   | 0   | 0   | 0   | 1   | 1   | 1   | 2   | 0   | 1   | 1   | 1   | 1   |     |
| <i>mexA</i> |                   | 0                                        | 1   | 0   | 0   | 0   | 0   | 0   | 0   | 0   | 0   | 0   | 0   | 0   | 0   | 0   | 1   | 0   | 0   | 0   | 0   | 0   | 0   | 0   | 0   | 0   |     |
| <i>mexB</i> |                   | 0                                        | 0   | 0   | 0   | 0   | 0   | 0   | 0   | 0   | 0   | 0   | 0   | 2   | 0   | 0   | 1   | 2   | 1   | 1   | 0   | 1   | 0   | 2   | 1   | 1   |     |
| <i>oprM</i> |                   | 0                                        | 0   | 0   | 0   | 0   | 0   | 0   | 0   | 0   | 0   | 0   | 0   | 0   | 0   | 0   | 0   | 0   | 0   | 0   | 0   | 0   | 0   | 0   | 0   | 0   |     |
| <i>farB</i> |                   | 1                                        | 0   | 0   | 0   | 0   | 1   | 0   | 0   | 0   | 0   | 1   | 1   | 0   | 2   | 1   | 1   | 0   | 1   | 1   | 0   | 0   | 0   | 0   | 1   | 1   |     |
| <i>lrfA</i> |                   | 3                                        | 4   | 4   | 6   | 6   | 5   | 6   | 7   | 3   | 3   | 5   | 4   | 5   | 6   | 3   | 3   | 3   | 8   | 5   | 8   | 3   | 7   | 5   | 8   | 5   |     |
| <i>lrfA</i> |                   | 3                                        | 2   | 3   | 3   | 3   | 3   | 2   | 2   | 3   | 4   | 3   | 3   | 1   | 3   | 2   | 0   | 2   | 2   | 3   | 4   | 4   | 2   | 3   | 2   | 2   |     |
| <i>mexM</i> | Antibiotic efflux | 4                                        | 4   | 6   | 3   | 3   | 3   | 2   | 5   | 6   | 6   | 6   | 6   | 3   | 3   | 6   | 6   | 5   | 4   | 3   | 8   | 4   | 4   | 4   | 4   | 3   |     |
| <i>mdtC</i> |                   | 3                                        | 3   | 3   | 1   | 2   | 1   | 0   | 2   | 3   | 2   | 3   | 3   | 1   | 3   | 3   | 3   | 4   | 2   | 1   | 3   | 2   | 3   | 0   | 2   | 1   |     |
| <i>cysB</i> |                   | 0                                        | 0   | 0   | 0   | 0   | 0   | 0   | 0   | 0   | 0   | 0   | 1   | 0   | 1   | 0   | 0   | 0   | 0   | 0   | 0   | 0   | 0   | 0   | 0   | 0   |     |
| <i>mexY</i> |                   | 2                                        | 1   | 1   | 5   | 2   | 2   | 2   | 1   | 1   | 3   | 1   | 1   | 4   | 2   | 3   | 3   | 3   | 5   | 2   | 4   | 1   | 2   | 1   | 5   | 2   |     |
| <i>mexX</i> |                   | 3                                        | 3   | 3   | 4   | 3   | 3   | 3   | 3   | 3   | 3   | 2   | 2   | 4   | 3   | 2   | 2   | 3   | 4   | 4   | 7   | 3   | 4   | 3   | 4   | 4   |     |
| <i>macA</i> |                   | 1                                        | 1   | 1   | 1   | 1   | 1   | 1   | 1   | 1   | 0   | 1   | 1   | 1   | 1   | 0   | 0   | 1   | 1   | 1   | 1   | 1   | 1   | 1   | 1   | 1   |     |
| <i>macB</i> |                   | 1                                        | 2   | 1   | 3   | 1   | 2   | 1   | 1   | 1   | 1   | 1   | 1   | 2   | 1   | 2   | 2   | 2   | 1   | 2   | 2   | 2   | 0   | 2   | 1   | 2   |     |
| <i>opmQ</i> |                   | 3                                        | 3   | 1   | 4   | 4   | 1   | 2   | 1   | 1   | 1   | 3   | 3   | 3   | 4   | 1   | 1   | 2   | 5   | 2   | 4   | 2   | 4   | 3   | 5   | 2   |     |
| <i>mexS</i> |                   | 1                                        | 1   | 1   | 1   | 1   | 1   | 2   | 1   | 1   | 1   | 1   | 1   | 1   | 1   | 1   | 1   | 1   | 2   | 1   | 7   | 2   | 1   | 1   | 2   | 1   |     |
| <i>mexE</i> |                   | 0                                        | 0   | 0   | 1   | 0   | 0   | 0   | 0   | 0   | 0   | 0   | 0   | 0   | 0   | 0   | 0   | 0   | 0   | 1   | 0   | 0   | 1   | 0   | 0   | 1   |     |
| <i>mexF</i> |                   | 0                                        | 0   | 0   | 0   | 1   | 0   | 0   | 1   | 0   | 0   | 0   | 0   | 0   | 0   | 0   | 0   | 0   | 0   | 1   | 1   | 0   | 0   | 0   | 0   | 1   |     |
| <i>mexT</i> |                   | 2                                        | 2   | 2   | 2   | 1   | 3   | 3   | 2   | 3   | 2   | 1   | 3   | 2   | 2   | 2   | 2   | 2   | 1   | 2   | 3   | 3   | 2   | 1   | 1   | 2   |     |

|             |    |    |   |   |   |    |    |    |   |   |    |    |    |   |    |    |    |    |   |    |    |    |   |    |   |   |
|-------------|----|----|---|---|---|----|----|----|---|---|----|----|----|---|----|----|----|----|---|----|----|----|---|----|---|---|
| <i>oprN</i> | 0  | 0  | 0 | 1 | 1 | 0  | 0  | 0  | 0 | 0 | 0  | 0  | 1  | 1 | 1  | 1  | 0  | 1  | 1 | 5  | 2  | 1  | 0 | 1  | 1 | 1 |
| <i>adeC</i> | 0  | 6  | 0 | 5 | 4 | 1  | 5  | 0  | 0 | 7 | 0  | 0  | 4  | 0 | 0  | 0  | 5  | 0  | 0 | 6  | 0  | 1  | 4 | 0  | 0 | 0 |
| <i>muxC</i> | 0  | 1  | 0 | 1 | 0 | 0  | 2  | 2  | 0 | 1 | 1  | 1  | 0  | 1 | 1  | 1  | 0  | 0  | 0 | 1  | 0  | 0  | 0 | 0  | 0 | 0 |
| <i>muxB</i> | 0  | 0  | 0 | 0 | 0 | 0  | 0  | 0  | 0 | 0 | 0  | 0  | 1  | 1 | 1  | 1  | 1  | 0  | 0 | 0  | 0  | 0  | 0 | 0  | 0 | 0 |
| <i>muxA</i> | 1  | 2  | 1 | 1 | 1 | 0  | 1  | 1  | 1 | 1 | 3  | 3  | 1  | 1 | 2  | 2  | 1  | 1  | 1 | 1  | 1  | 1  | 1 | 1  | 1 | 1 |
| <i>opmA</i> | 2  | 1  | 1 | 6 | 5 | 0  | 5  | 1  | 1 | 0 | 1  | 1  | 3  | 0 | 0  | 0  | 3  | 3  | 3 | 5  | 3  | 4  | 1 | 3  | 5 | 5 |
| <i>taeA</i> | 1  | 3  | 1 | 2 | 3 | 1  | 1  | 1  | 1 | 2 | 2  | 2  | 4  | 1 | 2  | 2  | 2  | 1  | 3 | 4  | 2  | 3  | 2 | 1  | 3 | 3 |
| <i>farB</i> | 1  | 0  | 0 | 1 | 0 | 0  | 0  | 1  | 0 | 0 | 2  | 2  | 1  | 1 | 1  | 1  | 2  | 0  | 0 | 2  | 1  | 0  | 3 | 0  | 0 | 0 |
| <i>opmE</i> | 3  | 3  | 4 | 0 | 4 | 5  | 0  | 4  | 4 | 3 | 3  | 3  | 3  | 6 | 4  | 4  | 5  | 3  | 3 | 9  | 5  | 5  | 4 | 3  | 3 | 3 |
| <i>mexQ</i> | 4  | 5  | 2 | 2 | 2 | 1  | 0  | 2  | 2 | 2 | 1  | 1  | 2  | 4 | 1  | 1  | 2  | 4  | 2 | 3  | 4  | 5  | 0 | 4  | 2 | 2 |
| <i>mexP</i> | 0  | 2  | 1 | 1 | 2 | 2  | 0  | 2  | 1 | 2 | 1  | 1  | 1  | 0 | 1  | 1  | 0  | 2  | 2 | 5  | 2  | 1  | 0 | 2  | 2 | 2 |
| <i>nalD</i> | 0  | 0  | 0 | 0 | 0 | 0  | 0  | 0  | 0 | 0 | 0  | 0  | 0  | 0 | 0  | 0  | 0  | 0  | 1 | 0  | 0  | 0  | 0 | 0  | 1 | 1 |
| <i>mexK</i> | 0  | 0  | 1 | 2 | 4 | 0  | 0  | 2  | 1 | 0 | 1  | 1  | 1  | 2 | 1  | 1  | 0  | 1  | 1 | 8  | 1  | 1  | 1 | 1  | 1 | 1 |
| <i>mexZ</i> | 0  | 0  | 0 | 0 | 0 | 0  | 0  | 1  | 0 | 0 | 0  | 0  | 0  | 0 | 0  | 0  | 0  | 1  | 1 | 2  | 1  | 0  | 0 | 1  | 0 | 1 |
| <i>mexJ</i> | 2  | 0  | 0 | 2 | 2 | 1  | 0  | 1  | 0 | 0 | 0  | 0  | 3  | 1 | 0  | 0  | 0  | 2  | 2 | 3  | 0  | 3  | 2 | 2  | 2 | 2 |
| <i>mexL</i> | 1  | 1  | 0 | 1 | 1 | 0  | 0  | 1  | 0 | 0 | 0  | 0  | 1  | 0 | 0  | 0  | 0  | 1  | 1 | 1  | 0  | 1  | 1 | 1  | 1 | 1 |
| <i>adeC</i> | 1  | 2  | 2 | 2 | 3 | 0  | 2  | 1  | 0 | 1 | 2  | 2  | 2  | 2 | 0  | 0  | 0  | 1  | 2 | 2  | 0  | 0  | 0 | 0  | 2 | 2 |
| <i>mexG</i> | 0  | 0  | 0 | 0 | 1 | 0  | 0  | 0  | 0 | 0 | 0  | 0  | 0  | 0 | 0  | 0  | 0  | 1  | 0 | 3  | 0  | 0  | 0 | 1  | 0 | 0 |
| <i>mexH</i> | 0  | 0  | 0 | 2 | 0 | 0  | 1  | 0  | 0 | 0 | 0  | 0  | 2  | 1 | 0  | 0  | 0  | 1  | 1 | 2  | 0  | 1  | 2 | 1  | 1 | 1 |
| <i>mexI</i> | 1  | 0  | 0 | 1 | 1 | 0  | 2  | 0  | 0 | 2 | 0  | 0  | 1  | 0 | 0  | 0  | 0  | 2  | 1 | 0  | 0  | 0  | 1 | 1  | 1 | 1 |
| <i>opmD</i> | 1  | 1  | 1 | 2 | 2 | 0  | 1  | 0  | 1 | 0 | 0  | 0  | 3  | 0 | 0  | 0  | 2  | 2  | 2 | 4  | 1  | 3  | 3 | 2  | 2 | 2 |
| <i>mexV</i> | 3  | 2  | 1 | 3 | 3 | 1  | 1  | 2  | 1 | 2 | 2  | 2  | 2  | 1 | 2  | 2  | 2  | 2  | 2 | 4  | 1  | 3  | 1 | 2  | 2 | 2 |
| <i>mexW</i> | 0  | 4  | 1 | 1 | 3 | 1  | 1  | 0  | 2 | 1 | 1  | 1  | 3  | 2 | 2  | 2  | 1  | 2  | 2 | 2  | 0  | 3  | 2 | 2  | 2 | 2 |
| <i>Yjkk</i> | 2  | 2  | 2 | 2 | 2 | 2  | 2  | 2  | 2 | 2 | 2  | 2  | 1  | 2 | 2  | 2  | 2  | 0  | 1 | 3  | 2  | 2  | 2 | 0  | 1 | 1 |
| <i>oprJ</i> | 1  | 1  | 1 | 2 | 0 | 2  | 1  | 1  | 1 | 0 | 1  | 1  | 0  | 1 | 1  | 1  | 0  | 0  | 0 | 8  | 1  | 1  | 0 | 0  | 0 | 0 |
| <i>mexD</i> | 1  | 3  | 2 | 2 | 2 | 3  | 1  | 1  | 2 | 1 | 1  | 2  | 4  | 2 | 2  | 2  | 2  | 2  | 2 | 11 | 3  | 4  | 2 | 2  | 2 | 2 |
| <i>mexC</i> | 2  | 1  | 0 | 4 | 6 | 1  | 4  | 0  | 0 | 1 | 2  | 2  | 5  | 1 | 1  | 1  | 3  | 7  | 5 | 10 | 3  | 4  | 2 | 7  | 5 | 5 |
| <i>nfxB</i> | 0  | 0  | 0 | 0 | 0 | 0  | 0  | 0  | 0 | 0 | 0  | 0  | 0  | 1 | 0  | 0  | 0  | 0  | 0 | 1  | 0  | 0  | 0 | 0  | 0 | 0 |
| <i>opmH</i> | 10 | 10 | 1 | 0 | 0 | 10 | 10 | 11 | 1 | 0 | 11 | 11 | 12 | 0 | 10 | 10 | 10 | 10 | 1 | 9  | 10 | 11 | 1 | 10 | 1 | 1 |

|                    |                                      |   |   |   |    |   |   |   |   |   |   |   |    |   |   |   |   |   |   |    |    |   |   |   |   |   |   |
|--------------------|--------------------------------------|---|---|---|----|---|---|---|---|---|---|---|----|---|---|---|---|---|---|----|----|---|---|---|---|---|---|
| <i>emrE</i>        |                                      | 0 | 0 | 0 | 0  | 0 | 0 | 0 | 0 | 0 | 0 | 0 | 0  | 0 | 0 | 0 | 0 | 0 | 1 | 0  | 1  | 0 | 0 | 0 | 1 | 0 | 0 |
| <i>msbA</i>        |                                      | 4 | 4 | 0 | 4  | 4 | 0 | 2 | 0 | 0 | 1 | 2 | 2  | 4 | 1 | 0 | 0 | 0 | 4 | 5  | 3  | 1 | 4 | 0 | 4 | 5 | 5 |
| <i>adeC</i>        |                                      | 2 | 4 | 2 | 3  | 3 | 0 | 1 | 0 | 3 | 4 | 1 | 1  | 2 | 1 | 4 | 4 | 0 | 3 | 4  | 4  | 0 | 5 | 1 | 3 | 4 | 4 |
| <i>farB</i>        |                                      | 3 | 3 | 4 | 5  | 4 | 3 | 3 | 3 | 4 | 3 | 3 | 3  | 4 | 3 | 4 | 4 | 0 | 3 | 3  | 4  | 3 | 3 | 3 | 3 | 3 | 3 |
| <i>rosB</i>        |                                      | 1 | 0 | 2 | 1  | 1 | 1 | 1 | 0 | 2 | 1 | 1 | 1  | 3 | 1 | 3 | 3 | 1 | 2 | 2  | 1  | 0 | 1 | 2 | 2 | 2 | 2 |
| <i>catB7</i>       | <b>Antibiotic inactivation</b>       | 6 | 4 | 0 | 4  | 3 | 2 | 0 | 2 | 0 | 2 | 3 | 3  | 4 | 4 | 2 | 2 | 3 | 4 | 4  | 2  | 3 | 3 | 4 | 4 | 4 | 4 |
| <i>fosA</i>        |                                      | 0 | 0 | 1 | 0  | 0 | 1 | 0 | 0 | 1 | 0 | 1 | 1  | 0 | 1 | 1 | 1 | 0 | 0 | 0  | 0  | 0 | 1 | 0 | 0 | 0 | 0 |
| <i>ampR</i>        |                                      | 2 | 0 | 0 | 3  | 0 | 0 | 0 | 0 | 0 | 0 | 0 | 1  | 2 | 0 | 0 | 0 | 1 | 2 | 3  | 2  | 0 | 2 | 0 | 2 | 3 | 3 |
| <i>ampC</i>        |                                      | 1 | 1 | 2 | 4  | 6 | 3 | 0 | 3 | 2 | 1 | 1 | 0  | 4 | 2 | 0 | 0 | 2 | 5 | 4  | 12 | 2 | 4 | 4 | 5 | 4 | 4 |
| <i>Aph(3')-IIb</i> |                                      | 0 | 0 | 0 | 0  | 1 | 1 | 1 | 1 | 0 | 1 | 1 | 1  | 1 | 1 | 1 | 1 | 1 | 2 | 1  | 4  | 0 | 2 | 1 | 2 | 1 | 1 |
| <i>OXA-50</i>      |                                      | 3 | 1 | 0 | 3  | 2 | 1 | 4 | 2 | 0 | 1 | 2 | 1  | 2 | 1 | 1 | 1 | 2 | 2 | 2  | 4  | 0 | 2 | 0 | 2 | 2 | 2 |
| <i>gyrB</i>        |                                      | 0 | 0 | 0 | 0  | 0 | 0 | 0 | 0 | 0 | 0 | 0 | 0  | 1 | 1 | 0 | 0 | 0 | 0 | 0  | 0  | 0 | 0 | 0 | 0 | 0 | 0 |
| <i>alaS</i>        | 2                                    | 0 | 0 | 1 | 0  | 0 | 0 | 0 | 0 | 1 | 0 | 0 | 2  | 2 | 0 | 0 | 0 | 1 | 0 | 1  | 2  | 0 | 2 | 1 | 0 | 0 |   |
| <i>pmrC</i>        | 3                                    | 3 | 3 | 3 | 3  | 3 | 3 | 2 | 3 | 2 | 3 | 3 | 3  | 3 | 1 | 1 | 2 | 3 | 4 | 3  | 4  | 3 | 2 | 3 | 4 | 4 |   |
| <i>mfd</i>         | 2                                    | 2 | 0 | 3 | 1  | 0 | 1 | 0 | 0 | 0 | 2 | 2 | 1  | 1 | 0 | 0 | 0 | 2 | 1 | 3  | 0  | 1 | 1 | 2 | 1 | 1 |   |
| <i>gyrA</i>        | 0                                    | 0 | 1 | 1 | 0  | 0 | 0 | 0 | 1 | 2 | 1 | 1 | 1  | 0 | 0 | 0 | 0 | 1 | 1 | 0  | 0  | 1 | 0 | 1 | 1 | 1 |   |
| <i>rocS</i>        | 1                                    | 1 | 2 | 8 | 10 | 7 | 2 | 1 | 2 | 1 | 2 | 2 | 11 | 1 | 0 | 0 | 2 | 8 | 8 | 20 | 8  | 5 | 3 | 8 | 8 | 8 |   |
| <i>tufA</i>        | <b>Antibiotic target alternation</b> | 0 | 0 | 0 | 0  | 0 | 0 | 0 | 0 | 0 | 0 | 0 | 0  | 0 | 0 | 0 | 0 | 0 | 0 | 0  | 0  | 0 | 0 | 2 | 0 | 0 | 0 |
| <i>tufB</i>        |                                      | 0 | 1 | 0 | 0  | 0 | 0 | 0 | 0 | 0 | 0 | 0 | 0  | 0 | 0 | 0 | 0 | 0 | 0 | 0  | 0  | 0 | 0 | 0 | 0 | 0 | 0 |
| <i>ileS</i>        |                                      | 1 | 1 | 1 | 2  | 2 | 1 | 1 | 0 | 1 | 4 | 1 | 0  | 3 | 2 | 3 | 3 | 2 | 3 | 2  | 2  | 2 | 2 | 2 | 2 | 2 | 2 |
| <i>parC</i>        |                                      | 1 | 0 | 0 | 1  | 1 | 0 | 0 | 0 | 0 | 0 | 0 | 0  | 1 | 0 | 0 | 0 | 0 | 2 | 2  | 1  | 1 | 1 | 0 | 2 | 1 | 2 |
| <i>parE</i>        |                                      | 0 | 0 | 1 | 1  | 1 | 0 | 0 | 0 | 1 | 0 | 0 | 0  | 1 | 3 | 0 | 0 | 0 | 1 | 1  | 1  | 2 | 1 | 0 | 1 | 2 | 1 |
| <i>pmrF</i>        |                                      | 0 | 0 | 0 | 1  | 0 | 0 | 0 | 0 | 1 | 0 | 0 | 0  | 0 | 0 | 0 | 0 | 0 | 0 | 0  | 3  | 0 | 0 | 0 | 0 | 0 | 0 |
| <i>arnA</i>        |                                      | 2 | 3 | 1 | 2  | 3 | 1 | 2 | 1 | 1 | 0 | 3 | 3  | 4 | 0 | 2 | 2 | 1 | 3 | 3  | 6  | 1 | 3 | 3 | 3 | 3 | 3 |
| <i>mprF</i>        |                                      | 0 | 4 | 1 | 2  | 8 | 1 | 1 | 1 | 1 | 1 | 3 | 3  | 5 | 1 | 3 | 3 | 5 | 6 | 2  | 9  | 6 | 6 | 2 | 6 | 2 | 2 |

Supplementary Table S3. Types of mutations in the mismatch repair system.

| <i>P. aeruginosa</i> isolates | Mutation in MMR genes                          |                                               |                                                                                                                                                                                                           |
|-------------------------------|------------------------------------------------|-----------------------------------------------|-----------------------------------------------------------------------------------------------------------------------------------------------------------------------------------------------------------|
|                               | <i>mutL</i>                                    | <i>mutS</i>                                   | <i>uvrD</i>                                                                                                                                                                                               |
| 123                           | 1SNP(missense_variant c.1034C>T p.Pro345Leu)   | 1SNP(missense_variant c.232G>A p.Val78Ile)    | 1 complex(missense_variant c.705_709delGCGGAinsACGGG p.Ile237Val)                                                                                                                                         |
| 126                           | 0                                              | 0                                             | 0                                                                                                                                                                                                         |
| 127                           | 0                                              | 1 MNP (missense_variant c.559G>T p.Ala187Ser) | 1 MNP (missense_variant c.1985_1986delGTinsAC p.Ser662Asn) (1 Complex (missense_variant c.1985_1986delGTinsAC p.Ser662Asn)                                                                                |
| 162                           | 1 SNP (missense_variant c.1784A>G p.Asn595Ser) | 0                                             | 2 SNP (c.1031A>G p.Lys344Arg), (c.1666G>A p.Val556Ile), 1 mnp (c.1985_1986delGTinsAC p.Ser662Asn), 2 variant complex (c.1917_1921delGCCGGinsACCGT p.Ala641Ser), (c.1997_2001delACCTCinsGCCTG p.Asn666Ser) |

|     |                               |                                                 |                                                                                                                                                                                             |
|-----|-------------------------------|-------------------------------------------------|---------------------------------------------------------------------------------------------------------------------------------------------------------------------------------------------|
| 169 | 1 SPN(c.10G>A p.Ala4Thr)      | 1 complex (c.2341_2343delGCCinsACT p.Ala781Thr) | 2 SNP (c.1666G>A p.Val556Ile), (c.1921G>T p.Ala641Ser), 2 MNP(c.1031_1032delAGinsGA p.Lys344Arg), ( c.1985_1986delGTinsAC p.Ser662Asn), 1 complex (c.1997_2001delACCTCinsGCCTG p.Asn666Ser) |
| 176 | 1 SNP (c.1284G>T p.Glu428Asp) | 0                                               | 1 SNP (c.1970G>C p.Gly657Ala)                                                                                                                                                               |
| 181 | 0                             | 0                                               | 0                                                                                                                                                                                           |
| 182 | 0                             | 0                                               | 1 MNP(c.1985_1986delGTinsAC p.Ser662Asn), 1 complex (c.1997_2001delACCTCinsGCCTG p.Asn666Ser)                                                                                               |
| 223 | 0                             | 1 SNP (c.559G>T p.Ala187Ser)                    | 1 MNP (c.1985_1986delGTinsAC p.Ser662Asn), 1 complex (c.1997_2001delACCTCinsGCCTG p.Asn666Ser)                                                                                              |
| 224 | 1 SNP (c.1276G>A p.Ala426Thr) | 0                                               | 1 MNP (c.1985_1986delGTinsAC p.Ser662Asn), 1 complex (c.1997_2001delACCTCinsGCCTG p.Asn666Ser)                                                                                              |
| 225 | 0                             | 0                                               | 2 SNP (c.1666G>A p.Val556Ile), (c.1921G>T p.Ala641Ser), 2MNP (c.1031_1032delAGinsGA p.Lys344Arg), (c.1985_1986delGTinsAC p.Ser662Asn), 1 complex (c.1997_2001delACCTCinsGCCTG p.Asn666Ser)  |

|     |                             |   |                                                                                                                                                                                           |
|-----|-----------------------------|---|-------------------------------------------------------------------------------------------------------------------------------------------------------------------------------------------|
| 227 | 0                           | 0 | 2 SNP (c.1666G>A p.Val556Ile), (c.1921G>T p.Ala641Ser), 2 MNP (c.1031_1032delAGinsGA p.Lys344Arg) (c.1985_1986delGTinsAC p.Ser662Asn), 1 complex(c.1997_2001delACCTCinsGCCTG p.Asn666Ser) |
| 233 | 0                           | 0 | 1 MNP (c.1985_1986delGTinsAC p.Ser662Asn), 1 complex (c.1997_2001delACCTCinsGCCTG p.Asn666Ser)                                                                                            |
| 235 | 0                           | 0 | 0                                                                                                                                                                                         |
| 188 | 0                           | 0 | 1 MNP (c.1985_1986delGTinsAC p.Ser662Asn), 1 complex (c.1997_2001delACCTCinsGCCTG p.Asn666Ser), 1 complex (c.1997_2001delACCTCinsGCCTG p.Asn666Ser)                                       |
| 189 | 1 SNP (c.265A>G p.Lys89Glu) | 0 | 1 MNP (c.1985_1986delGTinsAC p.Ser662Asn), 1 complex (c.1997_2001delACCTCinsGCCTG p.Asn666Ser)                                                                                            |
| 193 | 0                           | 0 | 0                                                                                                                                                                                         |

|     |                                                       |                                                         |                                                                                                                                                                                                                                      |
|-----|-------------------------------------------------------|---------------------------------------------------------|--------------------------------------------------------------------------------------------------------------------------------------------------------------------------------------------------------------------------------------|
| 198 | 2 SNP (c.1172C>T p.Ala391Val),<br>(c.10G>A p.Ala4Thr) | 0                                                       | 1 SNP (c.1666G>A p.Val556Ile), 3 complex<br>(c.1917_1921delGCCGGinsACCGT<br>p.Ala641Ser), (c.1985_1986delGTinsAC<br>p.Ser662Asn),<br>(c.1997_2001delACCTCinsGCCTG<br>p.Asn666Ser)                                                    |
| 202 | 1 SNP (c.1172C>T p.Ala391Val)                         | 1 complex (c.2341_2343delGCCinsACT<br>p.Ala781Thr)      | 1 SNP (c.1666G>A p.Val556Ile), 2 MNP<br>(c.1031_1032delAGinsGA p.Lys344Arg),<br>(c.1985_1986delGTinsAC p.Ser662Asn), 2<br>complexes<br>(c.1917_1921delGCCGGinsACCGT<br>p.Ala641Ser),<br>(c.1997_2001delACCTCinsGCCTG<br>p.Asn666Ser) |
| 206 | 1 MPN (c.5_6delGTinsAC p.Ser2Asn)                     | 1 complex<br>(c.837_841delCCTCAinsTCTCG<br>p.Ser281Gly) | 0                                                                                                                                                                                                                                    |
| 216 | 0                                                     | 0                                                       | 0                                                                                                                                                                                                                                    |
| 217 | 2 SNPS (.1172C>T p.Ala391Val),<br>(c.10G>A p.Ala4Thr) | 1 complex (c.2341_2343delGCCinsACT<br>p.Ala781Thr)      | 1 SNP (c.1249G>A p.Ala417Thr), 2 MNP<br>(c.1031_1032delAGinsGA p.Lys344Arg),<br>(c.1985_1986delGTinsAC p.Ser662Asn), 1<br>complex<br>(c.1997_2001delACCTCinsGCCTG<br>p.Asn666Ser)                                                    |
| 218 |                                                       |                                                         |                                                                                                                                                                                                                                      |



|     |                                                       |                                                    |                                                                                                                                                                                                                                                                                                                                          |
|-----|-------------------------------------------------------|----------------------------------------------------|------------------------------------------------------------------------------------------------------------------------------------------------------------------------------------------------------------------------------------------------------------------------------------------------------------------------------------------|
| 219 | 2 SNP (c.1172C>T p.Ala391Val),<br>(c.10G>A p.Ala4Thr) | 0                                                  | 1 SNP (c.1666G>A p.Val556Ile), 1 MNP<br>(c.1985_1986delGTinsAC p.Ser662Asn), 2<br>complex<br>(c.1917_1921delGCCGGinsACCGT<br>p.Ala641Ser), (<br>c.1997_2001delACCTCinsGCCTG<br>p.Asn666Ser)                                                                                                                                              |
| 220 | 1 SNP (c.1172C>T p.Ala391Val)                         | 1 complex (c.2341_2343delGCCinsACT<br>p.Ala781Thr) | 1 SNP (c.1666G>A p.Val556Ile), 2 MNP<br>(c.1031_1032delAGinsGA p.Lys344Arg),<br>(c.1985_1986delGTinsAC p.Ser662Asn), 2<br>complexes<br>(c.1917_1921delGCCGGinsACCGT<br>p.Ala641Ser), (c.1985_1986delGTinsAC<br>p.Ser662Asn), 2 complex<br>(c.1917_1921delGCCGGinsACCGT),<br>(c.1997_2001delACCTCinsGCCTG<br>p.Asn666Ser) p.Ala641Ser), ( |
| 221 | 1 SNP (c.1172C>T p.Ala391Val)                         | 1 complex (c.2341_2343delGCCinsACT<br>p.Ala781Thr) | 1 SNP ( c.1666G>A p.Val556Ile), 2 MNP<br>(c.1031_1032delAGinsGA p.Lys344Arg),<br>(c.1985_1986delGTinsAC p.Ser662Asn), 2<br>complex<br>(c.1917_1921delGCCGGinsACCGT<br>p.Ala641Ser),<br>(c.1997_2001delACCTCinsGCCTG<br>p.Asn666Ser)                                                                                                      |

Supplementary table S4. Genomics features of *P. aeruginosa* isolates.

| <i>P. aeruginosa</i> isolates | Accession number   | Source          | Genome size (bp) | GC % | Contigs | Core genes | Shell genes | Pan/total genes |
|-------------------------------|--------------------|-----------------|------------------|------|---------|------------|-------------|-----------------|
| PA17                          | NZ_QDGR00000000.1  | Eye isolate     | 6360407          | 66.4 | 58      | 5524       | 545         | 6069            |
| PA40                          | NZ_QDGW00000000.1  | Eye isolate     | 6281273          | 66.4 | 97      | 5465       | 532         | 5997            |
| PA55                          | NZ_QDGH00000000.1  | Cystic fibrosis | 6235426          | 66.6 | 76      | 5682       | 66          | 5748            |
| PA57                          | NZ_QDGS00000000.1  | Cystic fibrosis | 6332663          | 66.5 | 70      | 5278       | 999         | 6277            |
| PA59                          | NZ_CP024630.1      | Cystic fibrosis | 6289631          | 66.5 | 76      | 5485       | 561         | 6046            |
| PA64                          | NZ_QDGF00000000.1  | Cystic fibrosis | 6264146          | 66.6 | 85      | 5470       | 533         | 6003            |
| PA66                          | NZ_QDGE00000000.1  | Cystic fibrosis | 6337182          | 66.5 | 92      | 5478       | 637         | 6115            |
| PA82                          | NZ_QDGM00000000.1  | Eye isolate     | 6386862          | 66.5 | 60      | 5452       | 667         | 6119            |
| PA86                          | NZ_QDGD00000000.1  | Cystic fibrosis | 6170765          | 66.5 | 75      | 5346       | 758         | 6104            |
| PA92                          | NZ_QDGC00000000.1  | Cystic fibrosis | 6144291          | 66.6 | 79      | 5424       | 497         | 5921            |
| PA100                         | NZ_QDGV00000000.1  | Cystic fibrosis | 6309141          | 66.5 | 78      | 5435       | 623         | 6058            |
| PA102                         | NZ_QDGU00000000.1  | Cystic fibrosis | 6245346          | 66.5 | 61      | 5493       | 489         | 5982            |
| PA149                         | NZ_QDGL00000000.1  | Eye isolate     | 6314561          | 66.5 | 57      | 5491       | 526         | 6017            |
| PA157                         | NZ_QD GK00000000.1 | Eye isolate     | 6248837          | 66.5 | 51      | 5456       | 560         | 6016            |

|          |                     |                       |         |      |     |      |      |      |
|----------|---------------------|-----------------------|---------|------|-----|------|------|------|
| PA171    | NZ_QDGJ00000000.1   | Eye isolate           | 6339042 | 66.5 | 58  | 5498 | 582  | 6080 |
| PA175    | NZ_QDGI00000000.1   | Eye isolate           | 6757369 | 66.2 | 60  | 5446 | 1050 | 6496 |
| PA121617 | CP016214.1          | Sputum                | 6430493 | 66.4 | 1   | 5497 | 589  | 6086 |
| PA_D1    | CP012585.1          | Sputum                | 6643823 | 66.2 | 1   | 5437 | 924  | 6361 |
| PA_D2    | CP012578.1          | Sputum                | 6642996 | 66.2 | 1   | 5435 | 924  | 6359 |
| PA_D9    | CP012580.1          | Sputum                | 6645477 | 66.2 | 1   | 5435 | 935  | 6370 |
| PA_D16   | CP012581.1          | Sputum                | 6681975 | 66.2 | 1   | 5437 | 961  | 6398 |
| AAK/M5   | NZ_JACGTC00000000.1 | Environmental         | 6595587 | 65.3 | 155 | 5518 | 688  | 6206 |
| AAK/M11  | NZ_JACFOK00000000.1 | Environmental         | 6737177 | 65.9 | 164 | 5486 | 935  | 6421 |
| PAL1.16  | NZ_JACEVD00000000.1 | Pneumonia             | 6946945 | 65.9 | 130 | 5435 | 1270 | 6705 |
| PAL1.34  | NZ_JACEVA00000000.1 | Pneumonia             | 6404462 | 66.5 | 40  | 5454 | 724  | 6178 |
| PAL1.67  | NZ_JACEUY00000000.1 | Pneumonia             | 6926712 | 66.1 | 58  | 5468 | 1266 | 6734 |
| PAL1.7   | NZ_JACEQP00000000.1 | Pneumonia             | 6625472 | 66.3 | 74  | 5437 | 899  | 6336 |
| PAL1.5   | NZ_JACEQR00000000.1 | Pneumonia             | 7017998 | 66   | 63  | 5508 | 1243 | 6751 |
| PAL1.8   | NZ_JACEQO00000000.1 | Pneumonia             | 6361965 | 66.5 | 38  | 5527 | 533  | 6060 |
| NNPS180  | NZ_JACCIH00000000.1 | Soft tissue infection | 6602334 | 66.2 | 140 | 5392 | 1023 | 6415 |
| NNPS244  | NZ_JACCII00000000.1 | Soft tissue infection | 6909183 | 66   | 141 | 5484 | 1175 | 6659 |
| LESB58   | NC_011770.1         | Sputum                | 6601757 | 66.3 | 1   | 5493 | 831  | 6324 |
| DK2      | CP003149.1          | Sputum                | 6402658 | 66.3 | 1   | 5386 | 851  | 6237 |
| VRFPA04  | CP008739.2          | Corneal button        | 6818030 | 66.5 | 1   | 5137 | 1622 | 6759 |

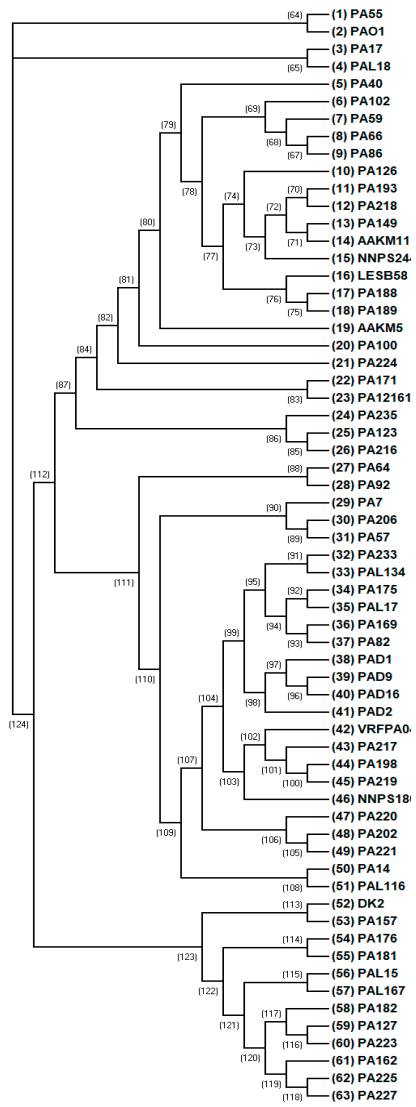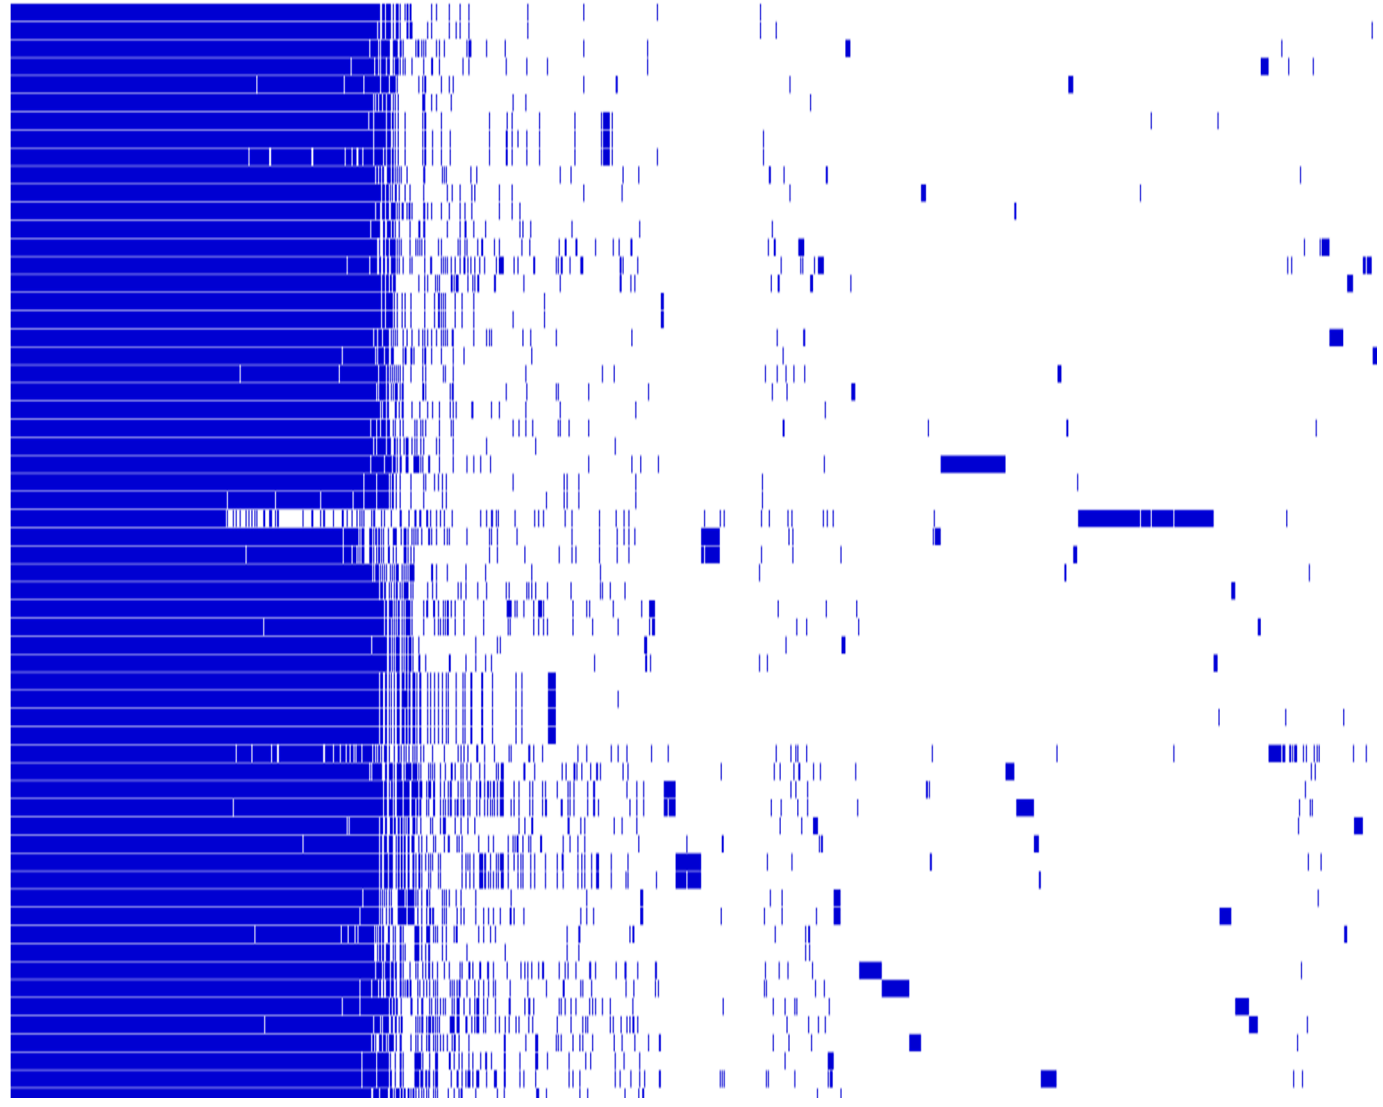

**Supplementary Figure S1.** Pan-genome phylogenetic tree. The data on the right of the figure shows the presence and absence of genes. The tree was built using the genome of PAO1 as a reference.
